# Supplementary material
Source: PubMed Central journal article supplement (PMC10246497)
Supplement: ehp11545.s001.acco.pdf [file ehp11545.s001.acco.pdf]

**Note to readers with disabilities:** *EHP* strives to ensure that all journal content is accessible to all readers. However, some figures and Supplemental Material published in *EHP* articles may not conform to [508 standards](#) due to the complexity of the information being presented. If you need assistance accessing journal content, please contact [ehp508@niehs.nih.gov](mailto:ehp508@niehs.nih.gov). Our staff will work with you to assess and meet your accessibility needs within 3 working days.

### **Supplemental Material**

#### **Associations of Gestational Perfluoroalkyl Substances Exposure with Early Childhood BMI z-Scores and Risk of Overweight/Obesity: Results from the ECHO Cohorts**

Yun Liu, Adaeze C. Wosu, Abby F. Fleisch, Anne L. Dunlop, Anne P. Starling, Assiamira Ferrara, Dana Dabelea, Emily Oken, Jessie P. Buckley, Leda Chatzi, Margaret R. Karagas, Megan E. Romano, Susan Schantz, Thomas G. O'Connor, Tracey J. Woodruff, Yeyi Zhu, Ghassan B. Hamra, Joseph M. Braun and the program collaborators for Environmental influences on Child Health Outcomes

#### **Table of Contents**

**Additional File-** Excel Document
